# Supplementary material for: Loss of RMI2 Increases Genome Instability and Causes a Bloom-Like Syndrome
Source: PubMed Central journal article supplement (PMC5157948; doi:10.1371/journal.pgen.1006483), 2016-12-15
Supplement: pgen.1006483.s007.pdf [file pgen.1006483.s007.pdf]

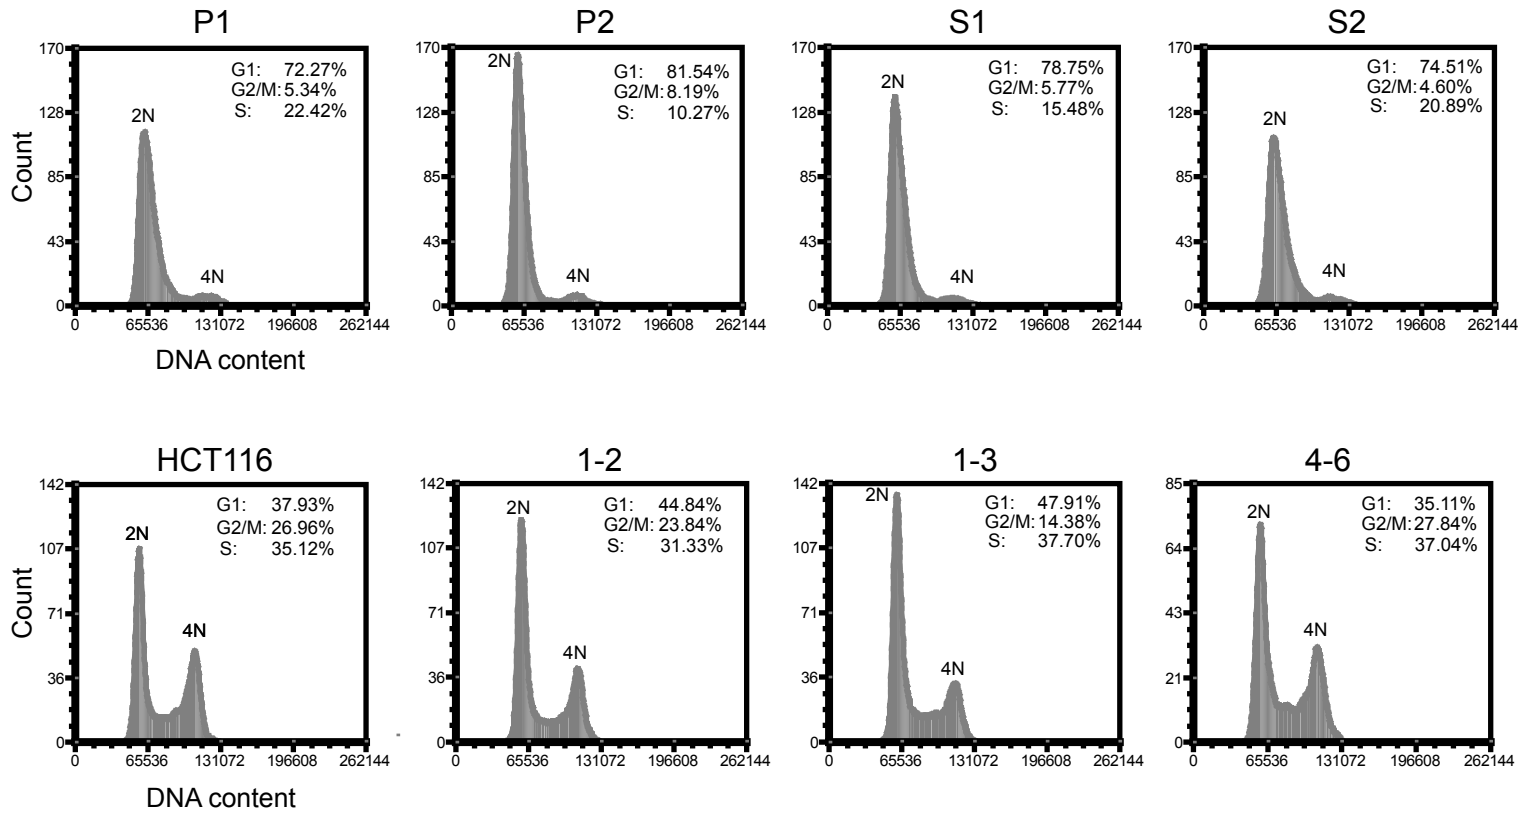

Supplementary Figure 7
